# Supplementary material for: The Invasive Plant Impatiens glandulifera Manipulates Microbial Associates of Competing Native Species
Source: MDPI journal article supplement (doi:10.3390/plants12071552), 2023-04-04
Supplement: s1 [file s1]

**Table S1** Isolation Frequency (%) mean of each endophyte species in *Impatiens glandulifera* across treatments. +PL referred to competition with *Plantago lanceolata* while +HL competition with *Holcus lanatus*. +/-AM were mycorrhizas present/absent plants.

| Endophyte species                   | Single |     | Intraspecific |     | Interspecific +PL |     | Interspecific +HL |     |
|-------------------------------------|--------|-----|---------------|-----|-------------------|-----|-------------------|-----|
|                                     | +AM    | -AM | +AM           | -AM | +AM               | -AM | +AM               | -AM |
| <i>Acremonium incoloratum</i>       | 0      | 0   | 6.67          | 0   | 0                 | 0   | 0                 | 0   |
| <i>Alternaria alternata</i>         | 0      | 0   | 20            | 0   | 0                 | 0   | 0                 | 0   |
| <i>Chaetomium elatum</i>            | 0      | 0   | 0             | 20  | 0                 | 0   | 0                 | 0   |
| <i>Cladosporium cladosporioides</i> | 0      | 0   | 0             | 0   | 0                 | 0   | 0                 | 20  |
| <i>Cladosporium oxysporum</i>       | 20     | 0   | 0             | 20  | 0                 | 0   | 0                 | 10  |
| <i>Colletotrichum acutatum</i>      | 0      | 0   | 3.33          | 0   | 0                 | 0   | 0                 | 0   |
| <i>Penicillium spp.</i>             | 0      | 0   | 10            | 0   | 0                 | 0   | 0                 | 10  |

**Table S2** Isolation Frequency (%) mean of endophyte species in native plants. +/-AM were mycorrhizal present/absent plants.

| Endophyte species                           | <i>P. lanceolata</i> |       | <i>H. lanatus</i> |     |
|---------------------------------------------|----------------------|-------|-------------------|-----|
|                                             | +AM                  | -AM   | +AM               | -AM |
| <i>Acremonium incoloratum</i>               | 0                    | 0     | 5                 | 0   |
| <i>Arthrinium state Apiospora montagnei</i> | 0                    | 8.33  | 0                 | 0   |
| <i>Cladosporium oxysporum</i>               | 8.33                 | 16.67 | 0                 | 5   |
| <i>Colletotrichum acutatum</i>              | 0                    | 8.33  | 0                 | 0   |
| <i>Exophiala sp.</i>                        | 20                   | 0     | 15                | 15  |

**Table S3** Isolation Frequency (%) mean of each endophyte species across all 10 sampled plants in *Impatiens glandulifera*, *Urtica dioica* and *Cirsium arvense* at Royal Holloway campus. 'near' indicates plants growing close to *I. glandulifera*,; 'far' indicates plants growing at least 100 m distant from *I. glandulifera*. See section 2.2, main text.

| Endophyte species             | <i>I. glandulifera</i> | <i>U. dioica</i> |     | <i>C. arvense</i> |      |
|-------------------------------|------------------------|------------------|-----|-------------------|------|
|                               |                        | near             | far | near              | Far  |
| <i>Absidia spinosa</i>        | 0                      | 0                | 0   | 3.3               | 16.7 |
| <i>Acremonium zonatum</i>     | 0                      | 0                | 2.9 | 0                 | 0    |
| <i>Acremonium fusidioides</i> | 0                      | 9                | 0   | 0                 | 15.5 |
| <i>Alternaria alternata</i>   | 5                      | 0                | 7.9 | 0                 | 22   |

|                                     |       |      |      |      |      |
|-------------------------------------|-------|------|------|------|------|
| <i>Alternaria tenuissima</i>        | 0     | 0    | 0    | 14.5 | 20   |
| <i>Arthrinium arundinis</i>         | 0     | 0    | 0    | 5    | 3.33 |
| <i>Chaetomium bostrychodes</i>      | 2.5   | 0    | 14.3 | 0    | 0    |
| <i>Chaetosphaeronema hispidulum</i> | 0     | 0    | 34.1 | 0    | 0    |
| <i>Cladosporium cladosporioides</i> | 25    | 0    | 16.7 | 10.5 | 10   |
| <i>Cladosporium oxysporum</i>       | 33.33 | 14.3 | 19.4 | 8.3  | 13.1 |
| <i>Colletotrichum acutatum</i>      | 50    | 0    | 25   | 0    | 33.3 |
| <i>Colletotrichum dematium</i>      | 0     | 0    | 19.4 | 0    | 0    |
| <i>Gliocladium roseum</i>           | 0     | 0    | 0    | 0    | 0    |
| <i>Penicillium</i> spp. B           | 0     | 11.8 | 20.3 | 26.6 | 0    |
| <i>Periconiella mucunae</i>         | 0     | 0    | 0    | 0    | 0    |
| <i>Pseudofusidium</i> sp.           | 0     | 19.7 | 20   | 0    | 0    |
| <i>Phoma tropica</i>                | 0     | 7.1  | 10.5 | 0    | 10.5 |
| <i>Phoma eupyrena</i>               | 0     | 11.7 | 0    | 0    | 0    |
| <i>Phomopsis subordinaria</i>       | 0     | 9    | 29.4 | 0    | 12.3 |
| <i>Septofusidium elegantulum</i>    | 0     | 11.7 | 34.5 | 0    | 0    |
| <i>Trichoderma koningii</i>         | 0     | 0    | 0    | 5.3  | 25   |
| <i>Xylohypha nigrescens</i>         | 0     | 0    | 0    | 0    | 0    |

**Table S4** Isolation Frequency (%) mean of each endophyte species across all 10 sampled plants in *Impatiens glandulifera*, *Urtica dioica* and *Cirsium arvense* at Zeals, Wiltshire, UK. ‘near’ indicates plants growing close to *I. glandulifera*; ‘far’ indicates plants growing at least 100 m distant from *I. glandulifera*. See section 2.2, main text.

| Endophyte species              | <i>I. glandulifera</i> | <i>U. dioica</i> |     | <i>C. arvense</i> |      |
|--------------------------------|------------------------|------------------|-----|-------------------|------|
|                                |                        | near             | far | near              | far  |
| <i>Absidia spinosa</i>         | 0                      | 0                | 0   | 0                 | 0    |
| <i>Acremonium zonatum</i>      | 0                      | 0                | 10  | 0                 | 0    |
| <i>Acremonium fusidioides</i>  | 0                      | 0                | 0   | 12.5              | 22.5 |
| <i>Alternaria alternata</i>    | 10                     | 5                | 25  | 25                | 33.3 |
| <i>Alternaria tenuissima</i>   | 0                      | 0                | 0   | 0                 | 14.5 |
| <i>Arthrinium arundinis</i>    | 0                      | 0                | 0   | 0                 | 0    |
| <i>Chaetomium bostrychodes</i> | 0                      | 0                | 15  | 10                | 12.5 |

|                                     |      |      |      |    |      |
|-------------------------------------|------|------|------|----|------|
| <i>Chaetosphaeronema hispidulum</i> | 0    | 0    | 0    | 0  | 22.5 |
| <i>Cladosporium cladosporioides</i> | 12.5 | 5    | 10   | 5  | 12.5 |
| <i>Cladosporium oxysporum</i>       | 22.5 | 12   | 22.4 | 25 | 20   |
| <i>Colletotrichum acutatum</i>      | 15   | 0    | 33.3 | 0  | 15.5 |
| <i>Colletotrichum dematium</i>      | 0    | 0    | 0    | 0  | 10   |
| <i>Gliocladium roseum</i>           | 0    | 0    | 20   | 5  | 25   |
| <i>Penicillium</i> spp. B           | 0    | 0    | 14   | 0  | 0    |
| <i>Periconiella mucunae</i>         | 0    | 0    | 0    | 0  | 10.8 |
| <i>Pseudofusidium</i> sp.           | 0    | 3.33 | 12.5 | 0  | 0    |
| <i>Phoma tropica</i>                | 0    | 2.5  | 5.5  | 2  | 25   |
| <i>Phoma eupyrena</i>               | 0    | 0    | 0    | 0  | 0    |
| <i>Phomopsis subordinaria</i>       | 0    | 6    | 20   | 0  | 0    |
| <i>Septofusidium elegantulum</i>    | 0    | 5    | 15   | 0  | 0    |
| <i>Trichoderma koningii</i>         | 0    | 0    | 0    | 10 | 33.3 |
| <i>Xylohypha nigrescens</i>         | 0    | 0    | 0    | 0  | 2.8  |
